# Supplementary material for: Hierarchical carbon hollow nanospheres coupled with ultra-small molybdenum carbide as sulfiphilic sulfur hosts for lithium–sulfur batteries
Source: Royal Society of Chemistry journal article supplement (doi:10.1039/d3ra03167e), 2023-01-01
Supplement: d3ra03167e1.pdf [file d3ra03167e1.pdf]

## Supporting information

### **Hierarchical Carbon Hollow Nanospheres Coupled with Ultra-small Molybdenum Carbide as Sulfiphilic Sulfur Hosts for Lithium-Sulfur Batteries**

Huifa Shi,<sup>\*a,b</sup> Jiakai Cao,<sup>a,b</sup> Sa Han,<sup>a,b</sup> Weiyi Sun<sup>a,b</sup> Xiaoyang Zhu,<sup>a</sup> Guixia Lu,<sup>\*c,f</sup> Hongbo Lan<sup>a</sup> Huicong Yang<sup>d</sup> and Shuzhang Niu<sup>\*c</sup>

<sup>a</sup> *Shandong Engineering Research Center for Additive Manufacturing, Qingdao University of Technology, Qingdao 266520, China*

<sup>b</sup> *Key Lab of Industrial Fluid Energy Conservation and Pollution Control (Qingdao University of Technology), Ministry of Education, Qingdao 266520, China*

<sup>c</sup> *College of New Materials and New Energies, Shenzhen Technology University, Shenzhen 518118, China*

<sup>d</sup> *Shenyang National Laboratory for Materials Science, Institute of Metal Research, Chinese Academy of Sciences, Shenyang, 110016, China*

<sup>e</sup> *School of Civil Engineering, Qingdao University of Technology, Qingdao, Shandong, 266520, China*

<sup>f</sup> *Engineering Research Center of Concrete Technology under Marine Environment, Ministry of Education, Qingdao University of Technology, Qingdao, Shandong, 266520 China*

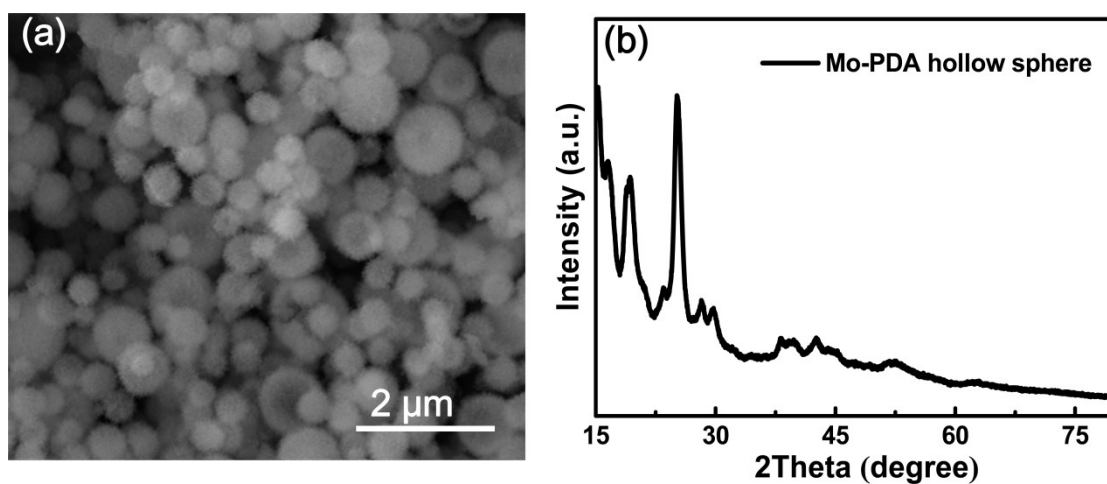

**Figure S1** SEM image (a) and XRD Pattern (b) of Mo-PDA mixture hollow sphere obtained by polymerization reaction.

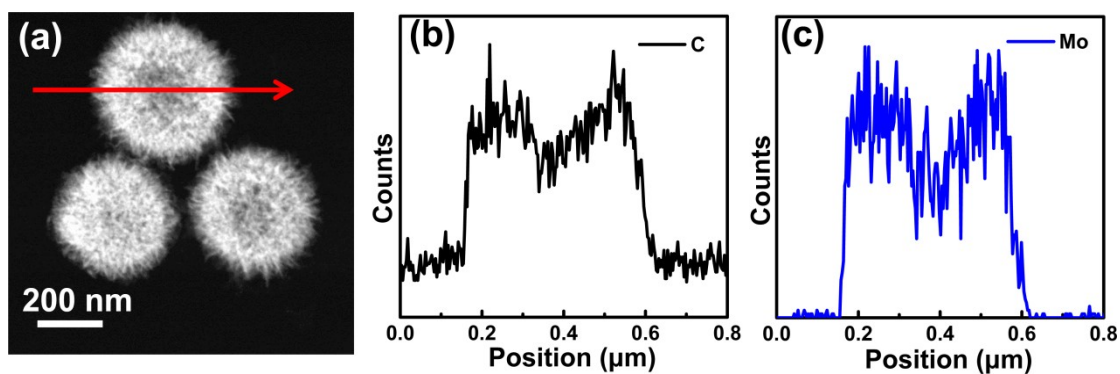

**Figure S2** (a) STEM image of MoC@N-HCS and corresponding EDS line-scanning of carbon (b) and molybdenum (c) elements across a selected area (red line in a).

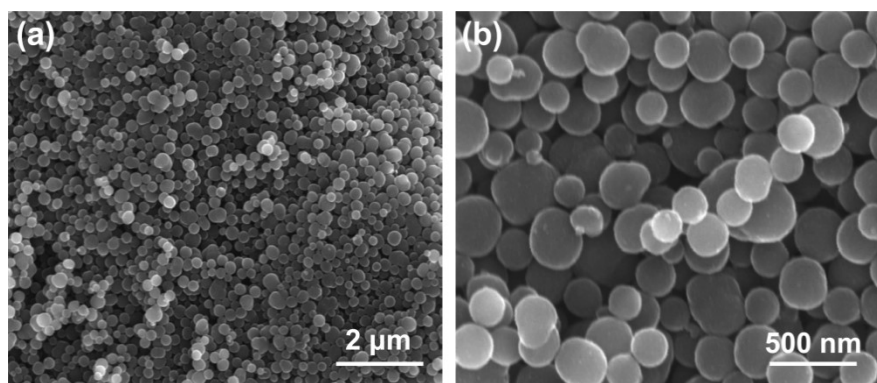

**Figure S3** SEM images of N-CS.

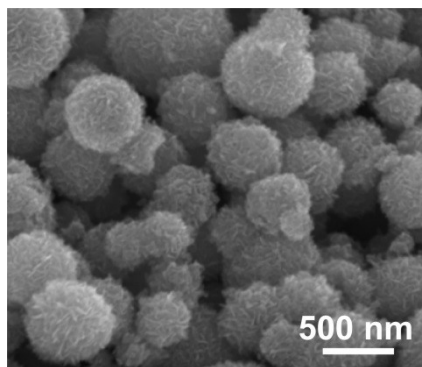

Figure S4 SEM image of MoC@N-HCS/S.

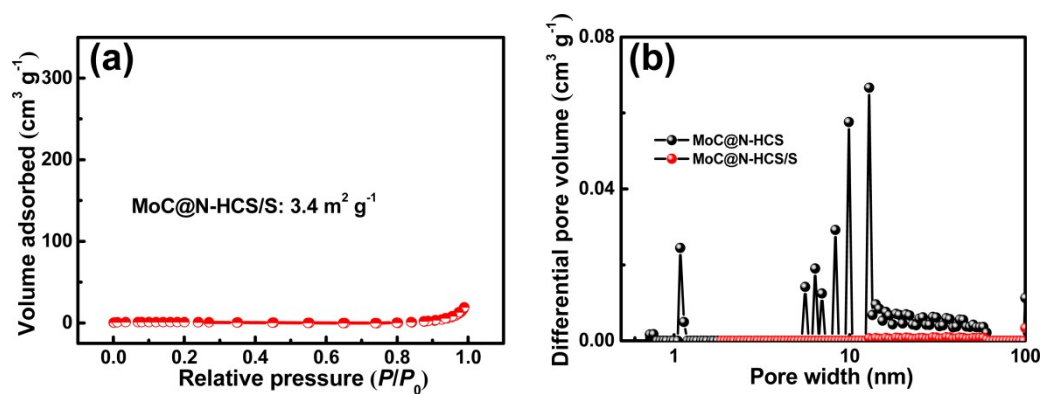

Figure S5 (a) N<sub>2</sub> adsorption/desorption isotherm of MoC@N-HCS/S. (b) Pore size distribution of MoC@N-HCS and MoC@N-HCS/S.

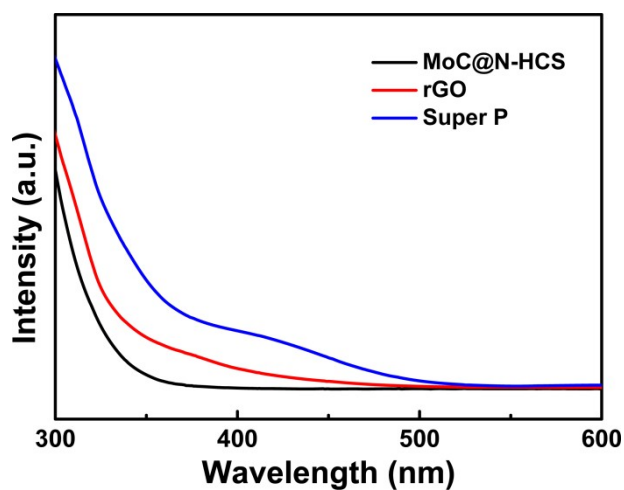

Figure S6 UV-Vis adsorption spectra of Li<sub>2</sub>S<sub>6</sub> solution with the addition of MoC@N-HCS, rGO and Super P.
